# Supplementary material for: A flexible nanostructured sulphur–carbon nanotube cathode with high rate performance for Li-S batteries
Source: Royal Society of Chemistry journal article supplement (doi:10.1039/c2ee22294a), 2012-01-01
Supplement: c2ee22294a.pdf [file c2ee22294a.pdf]

## Supplementary Information

### **A flexible nanostructured sulphur-carbon nanotube cathode with high rate performance for Li-S batteries**

Guangmin Zhou<sup>#a</sup>, Da-Wei Wang<sup>#b</sup>, Feng Li<sup>\*a</sup>, Peng-Xiang Hou<sup>a</sup>, Lichang Yin<sup>a</sup>, Chang Liu<sup>a</sup>,  
Gao Qing (Max) Lu<sup>b</sup>, Ian R. Gentle<sup>c</sup>, Hui-Ming Cheng<sup>\*a</sup>

<sup>a</sup>Shenyang National Laboratory for Materials Science, Institute of Metal Research, Chinese Academy of Sciences, 72 Wenhua Road, Shenyang 110016, P. R. China.

<sup>b</sup>ARC Centre of Excellence for Functional Nanomaterials, Australian Institute for Bioengineering and Nanotechnology, The University of Queensland, St Lucia, Brisbane 4072, Queensland, Australia.

<sup>c</sup>School of Chemistry and Molecular Biosciences, The University of Queensland, St Lucia, Brisbane 4072, Queensland, Australia.

<sup>#</sup> G.M.Z. and D.-W.W. are equal main contributors.

Correspondence should be addressed to H. M. C. Email: [cheng@imr.ac.cn](mailto:cheng@imr.ac.cn)

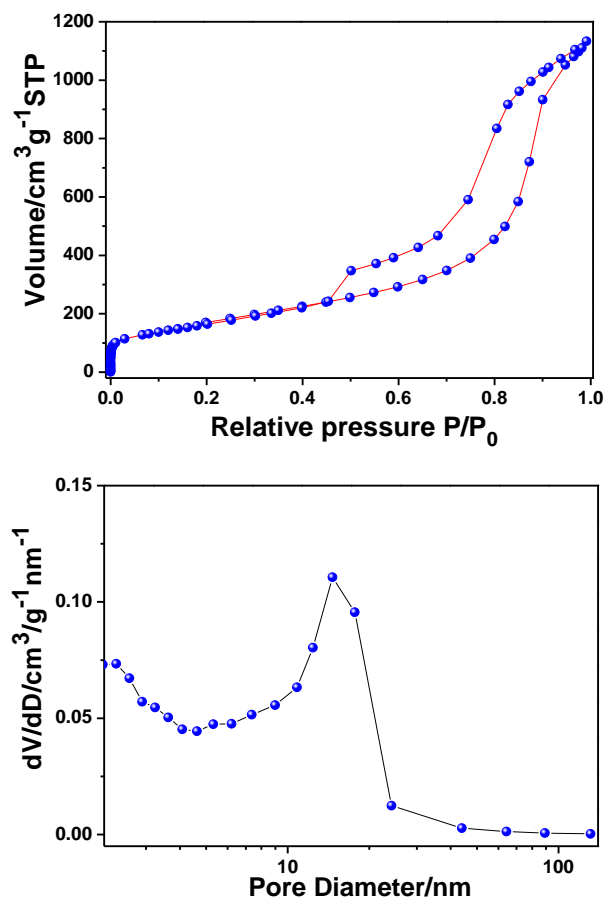

**Fig. S1** N<sub>2</sub> adsorption/desorption isotherm and pore size distribution of the S-CNT-23. Pore size distribution plots were obtained by the Barrett-Joyner-Halenda method.

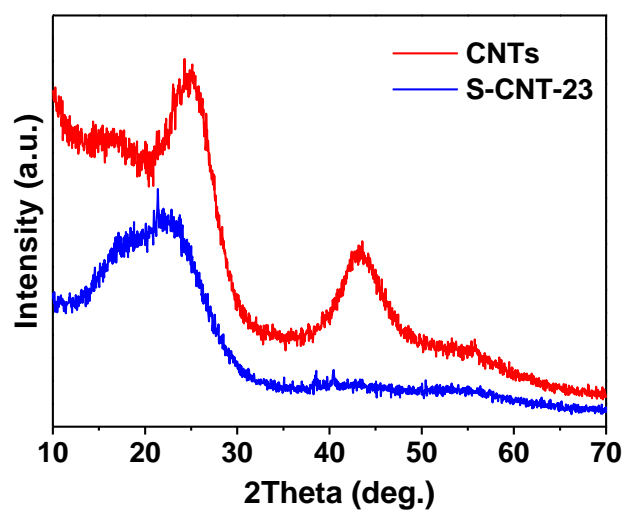

**Fig. S2** XRD patterns of the S-CNT-23 and CNTs.

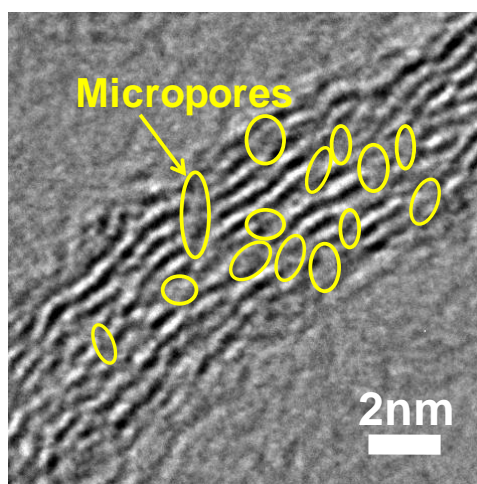

**Fig. S3** HRTEM image of the S-CNT showing pores (circled) that host sulphur.

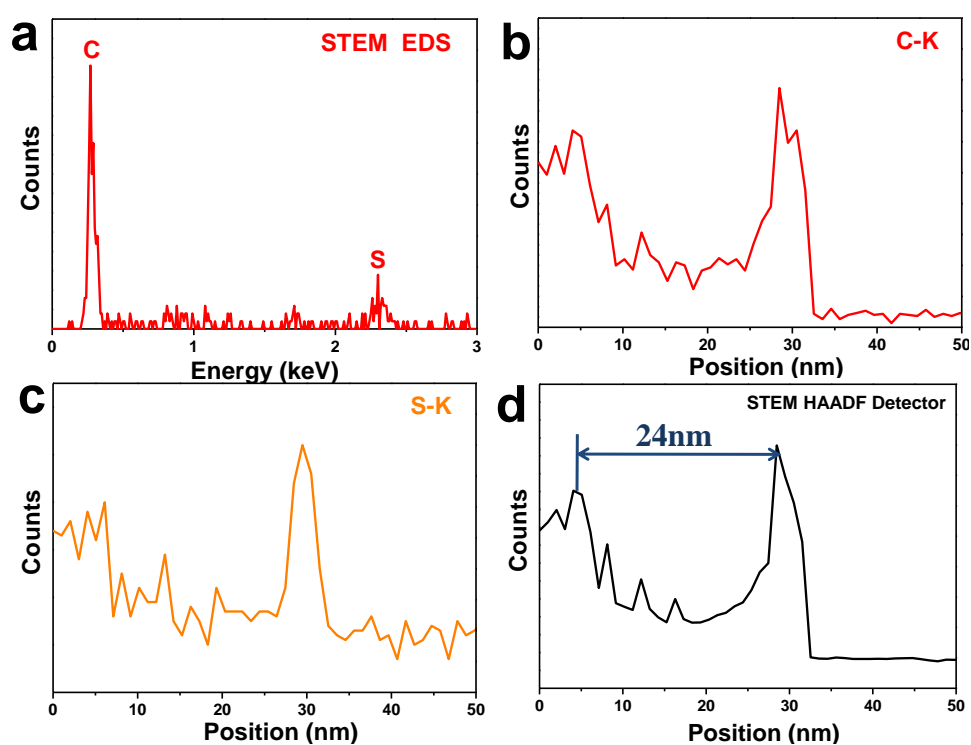

**Fig. S4** (a) EDS analysis of the S-CNT-23, showing the presence of carbon and sulphur. (b-d) EDS line scans across the S-CNT-23, showing elemental composition as a function of beam position.

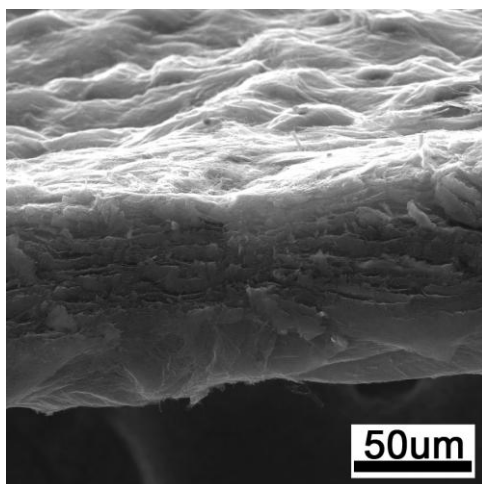

**Fig. S5** SEM image of a cross-sectional view of the S-CNT-23 membrane.

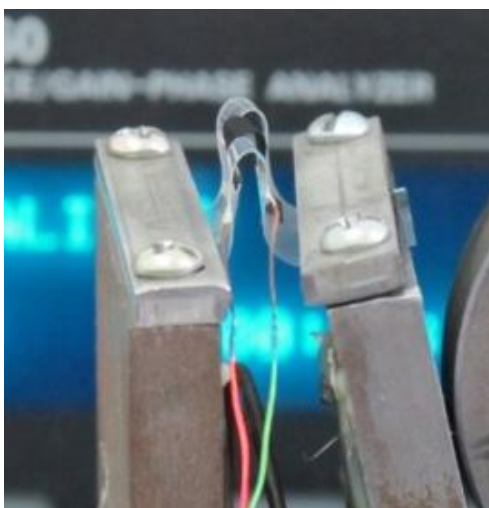

**Fig. S6** Apparatus for bending conductivity test.

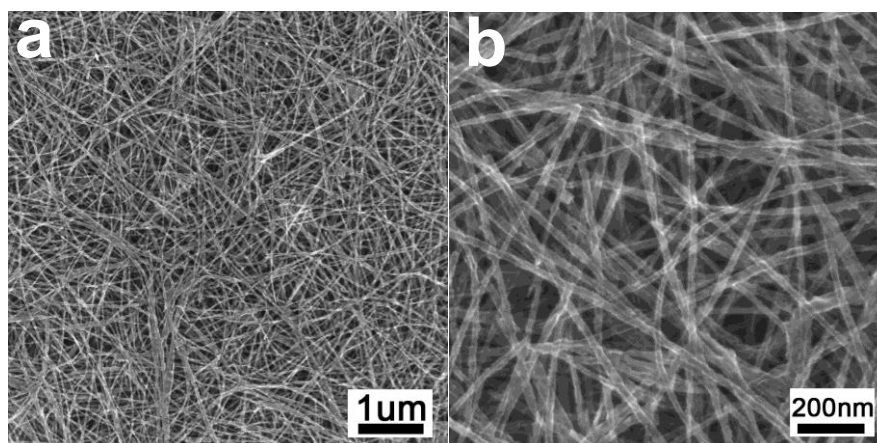

**Fig. S7** (a, b) SEM images of the S-CNT-50 membrane cathode after 100 charge/discharge cycles.

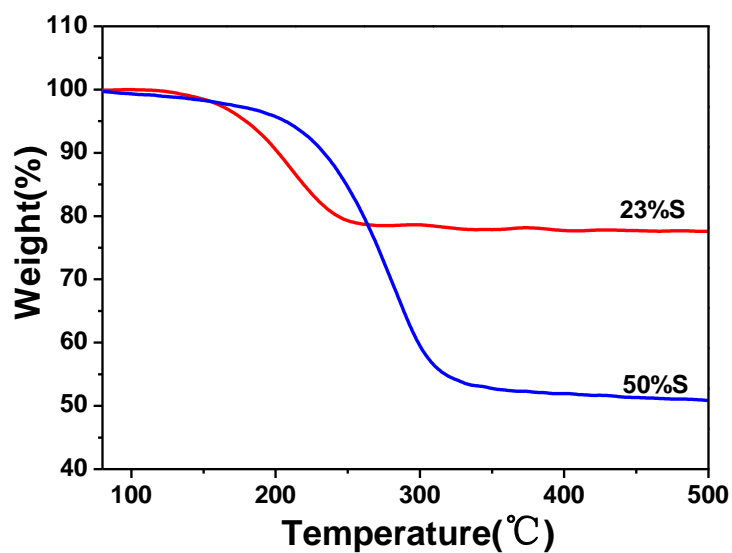

**Fig. S8** Thermogravimetric curve of the S-CNTs in Ar with a heating rate of  $10\text{ }^{\circ}\text{C min}^{-1}$ , indicating the sulphur content of 23.0 and 50.0 wt%.
